# Supplementary material for: Development and clinical validation of a novel detection kit for α-thalassemia in southern Chinese
Source: Front Genet. 2024 Sep 5;15:1457248. doi: 10.3389/fgene.2024.1457248 (PMC11410688; doi:10.3389/fgene.2024.1457248)
Supplement: Supplementary file 3 [file Table3.DOCX]

Table S3. The results of a verification test analyzed genomic DNA pre-characterized samples from 809 patients with thalassemia and using the novel polymerase chain reaction/reverse dot blot assay **Ⅲ**.

| α-Thalassemia | Cases (n) |
| --- | --- |
| --SEA/αα | 210 |
| -α3.7/αα | 145 |
| -α4.2/αα | 80 |
| αCSα/αα | 75 |
| αQSα/αα | 70 |
| αWSα/αα | 44 |
| αααanti 3.7 | 25 |
| αααanti 4.2 | 24 |
| --SEA/-α3.7 | 24 |
| --SEA/αWSα | 23 |
| --SEA/αCSα | 18 |
| --SEA/-α4.2 | 12 |
| --THAI/αα | 12 |
| -α3.7/αααanti 4.2 | 7 |
| -α3.7/αWSα | 6 |
| -α3.7/-α3.7 | 5 |
| -α3.7/αCSα | 5 |
| -α3.7/-α4.2 | 5 |
| --SEA/αQSα | 4 |
| --FIL/αα | 4 |
| -α4.2/αCSα | 3 |
| --SEA/-α3.7/αααanti 4.2 | 2 |
| -α4.2/αWSα | 2 |
| -α3.7/αααanti 3.7 | 1 |
| -α3.7/αCSα/αααanti 4.2 | 1 |
| -α4.2/-α4.2 | 1 |
| --SEA/αααanti 3.7  Total | 1  809 |
